# Supplementary material
Source: PubMed Central journal article supplement (PMC2773202)
Supplement: NIHMS126044-supplement-1.pdf [file NIHMS126044-supplement-1.pdf]

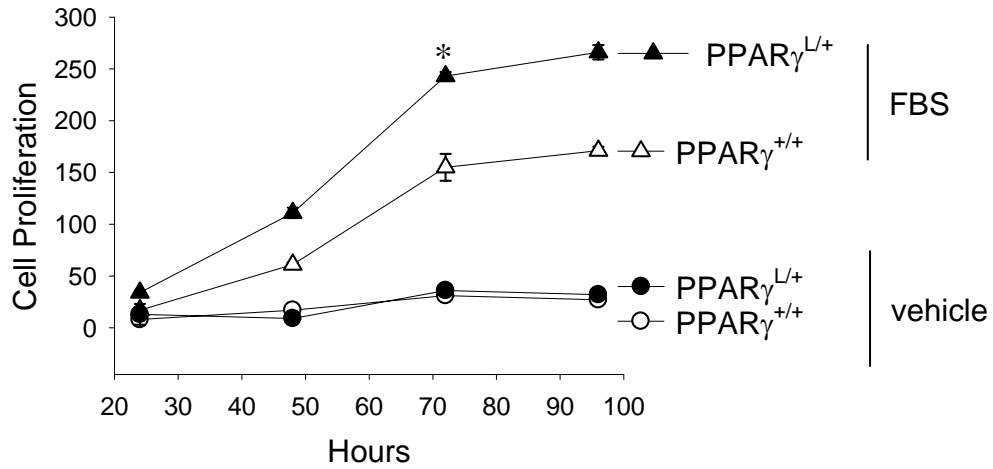

**Supplemental Figure 1. Enhanced serum-stimulated proliferation of PPAR $\gamma^{L/+}$  aortic SMC.** Serum starved PPAR $\gamma^{+/+}$  or PPAR $\gamma^{L/+}$  SMCs were plated onto a 96-well dishes with FBS (10%) or vehicle for 24, 48, 72 and 96 hours. At each given time point, WST-1 was added and incubated in each well for 2 hours. The absorbance of the resulting solution was then measured at 450 nm. Values are presented as mean  $\pm$  se. \* P = 0.003 versus at PPAR $\gamma^{+/+}$  72 hours.

### A. PPAR $\gamma^{+/+}$

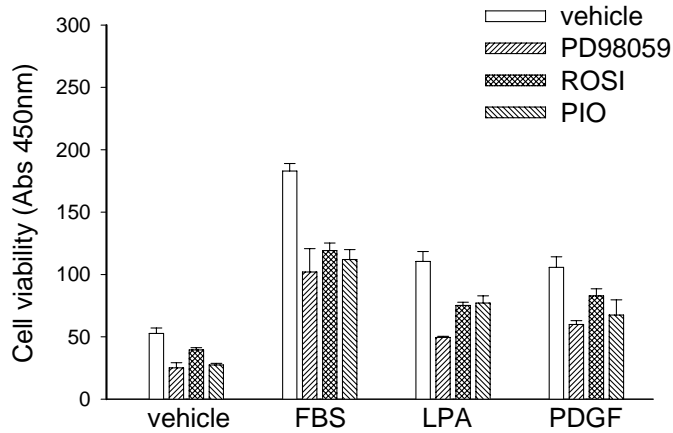

### B. PPAR $\gamma^{L/+}$

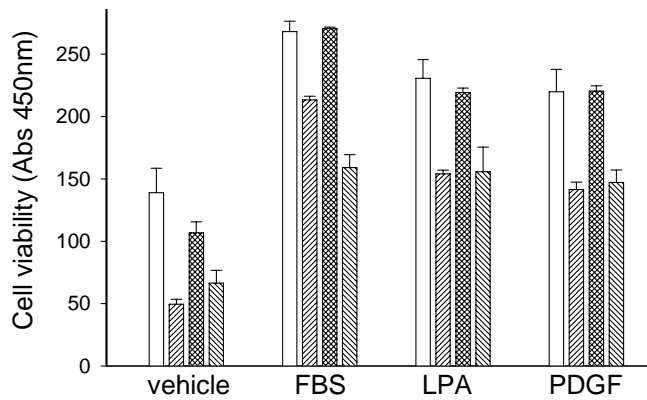

**Figure 2. Effects of ERK inhibitors and TZDs on PPAR $\gamma^{L/+}$  SMC proliferation.** Serum-starved PPAR $\gamma^{+/+}$  or PPAR $\gamma^{L/+}$  SMCs were plated onto a 96-well dishes with vehicle, FBS (10%), LPA (1  $\mu$ M), or PDGF (20 ng/ml) for 72 hours in the presence of either the MEK inhibitor PD98059 (10  $\mu$ M) or the TZDs rosiglitazone (ROSI; 10  $\mu$ M) or pioglitazone (PIO; 10  $\mu$ M). WST-1 was added and incubated in each well for 2 hours. The absorbance of the resulting solution was then measured at 450 nm. Values are presented as mean  $\pm$  sd.

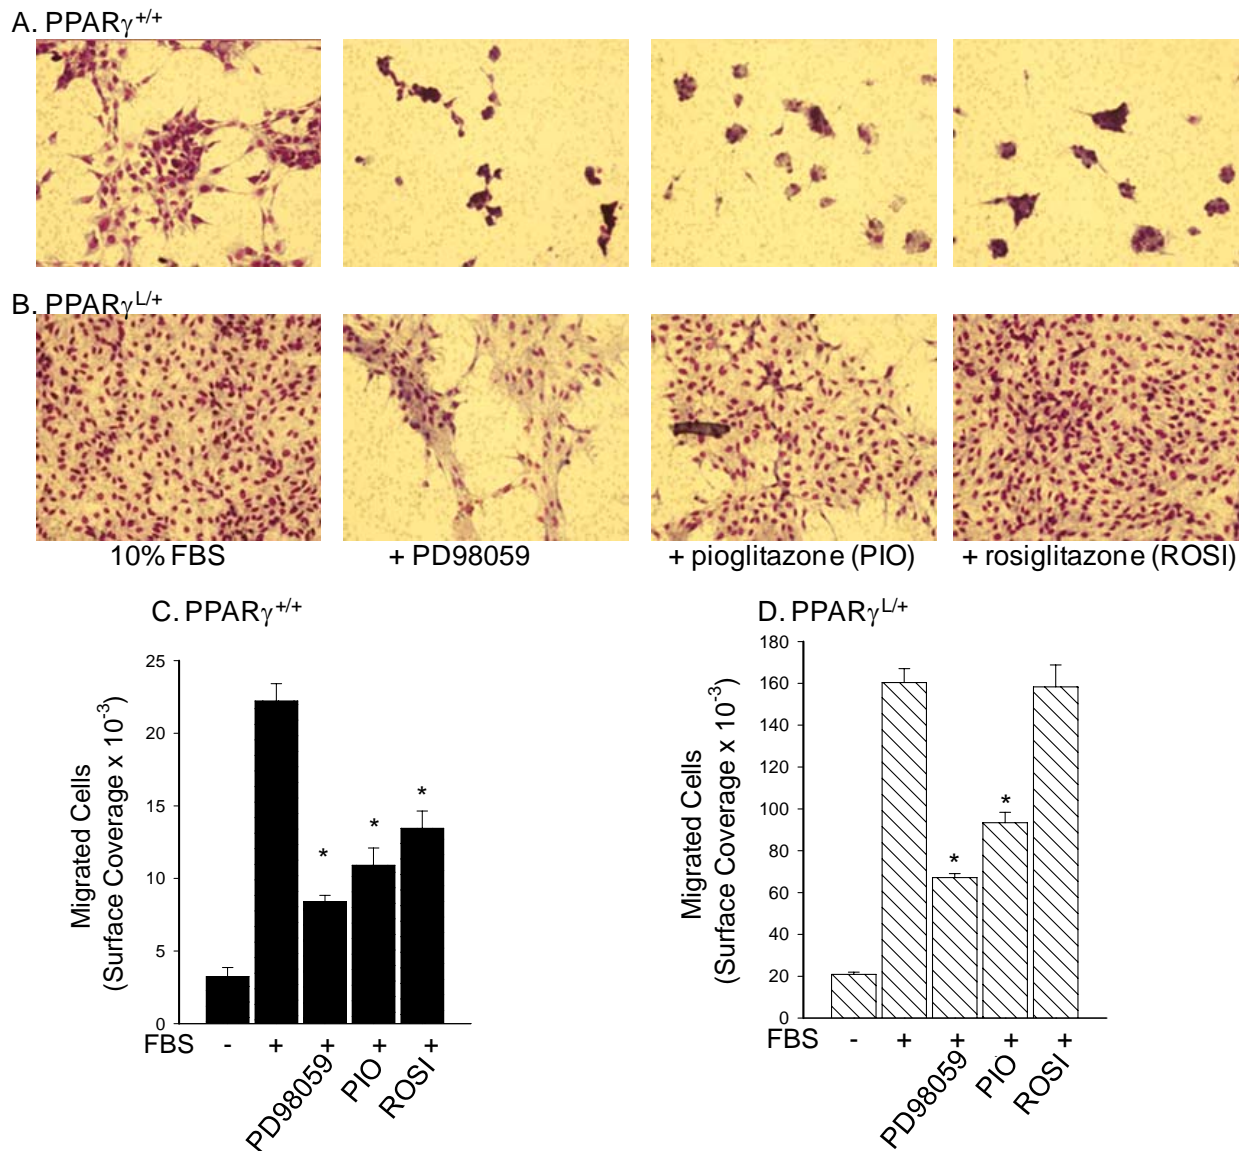

**Figure 3. Effects of ERK inhibitors and TZDs on PPAR $\gamma^{L/+}$  SMC migration.** (A) Representative images of migrated PPAR $\gamma^{+/+}$  SMCs and (B) PPAR $\gamma^{L/+}$  SMCs stained with Diff-Quik®. The migration assay was performed in the presence of 10% FBS and either the MEK inhibitor PD98059 (10  $\mu$ M) or the TZDs pioglitazone (PIO; 10  $\mu$ M) or rosiglitazone (ROSI; 10  $\mu$ M). The surface area occupied by migrated cells is graphed as mean  $\pm$  se. To demonstrate the effects of inhibitors, the results in PPAR $\gamma^{+/+}$  and PPAR $\gamma^{L/+}$  are graphed on different scales. \*P<0.05 versus untreated by ANOVA.
